# Supplementary material for: A Mouse Homolog of a Human TP53 Germline Mutation Reveals a Lipolytic Activity of p53
Source: PubMed Central journal article supplement — Cell Rep. Author manuscript; Available in PMC 2020 Feb 14. (PMC7021448; doi:10.1016/j.celrep.2019.12.074), 2020-01-21
Supplement: NIHMS1551550-supplement-1.pdf [file NIHMS1551550-supplement-1.pdf]

Cell Reports, Volume 30

## Supplemental Information

### A Mouse Homolog of a Human

### *TP53* Germline Mutation Reveals

### a Lipolytic Activity of p53

Ju-Gyeong Kang, Cory U. Lago, Ji-Eun Lee, Ji-Hoon Park, Matthew P. Donnelly, Matthew F. Starost, Chengyu Liu, Jaeyul Kwon, Audrey C. Noguchi, Kai Ge, Ping-yuan Wang, and Paul M. Hwang

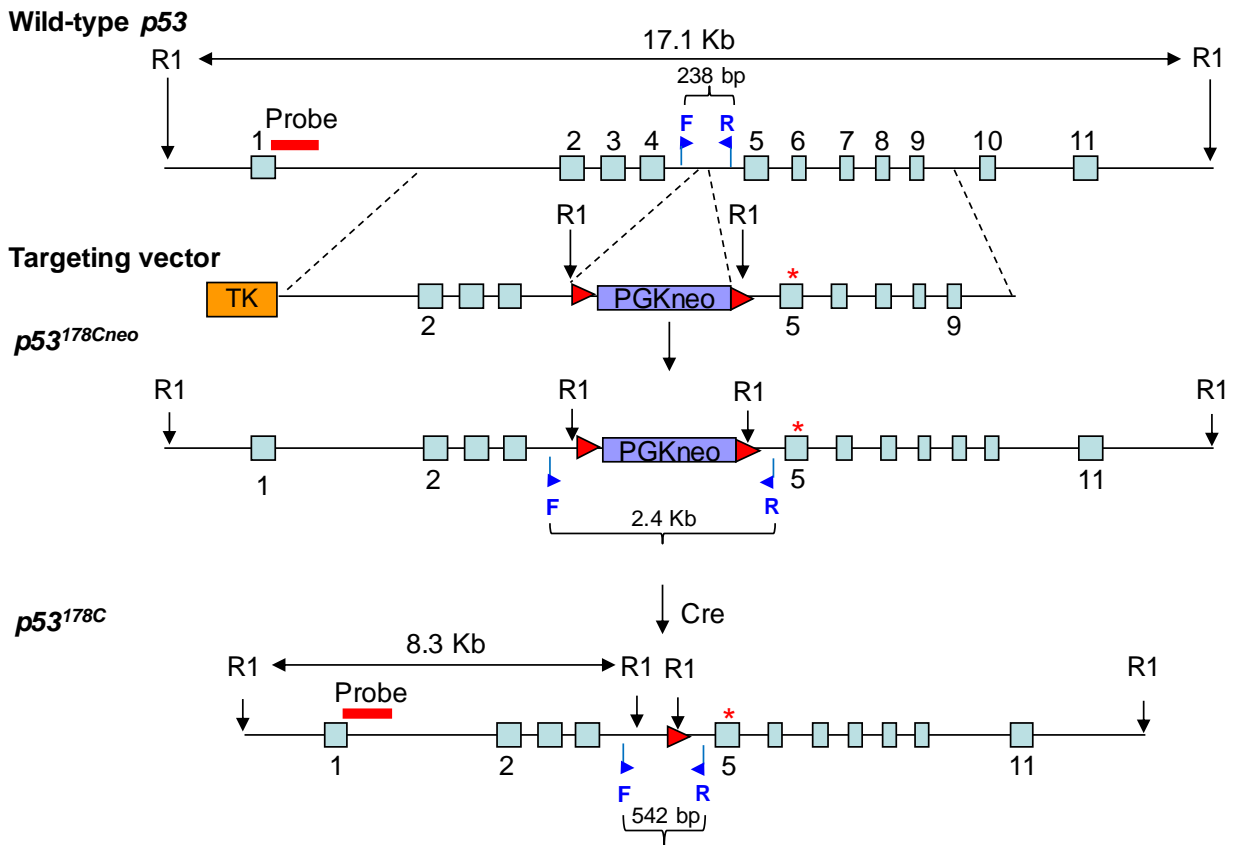

**Figure S1. Strategy for generating *p53* R178C knockin mouse, Related to Figure 1.**

Conventional ES cell-mediated strategy was used to knockin the missense mutation into the *p53* gene (*p53*<sup>R178C</sup>). Mice with germline transmission of the mutation were crossed with Cre-expressing mice to remove the neomycin (Neo) resistance gene flanked by *loxP* sites (triangles). Asterisk indicates the mutated nucleotide in exon 5 and horizontal arrowheads indicate forward and reverse primers for genotype screening. Genomic DNA was digested with *EcoRI* (R1) and analyzed with standard southern blot with the probe marked in red near Exon 1 region.

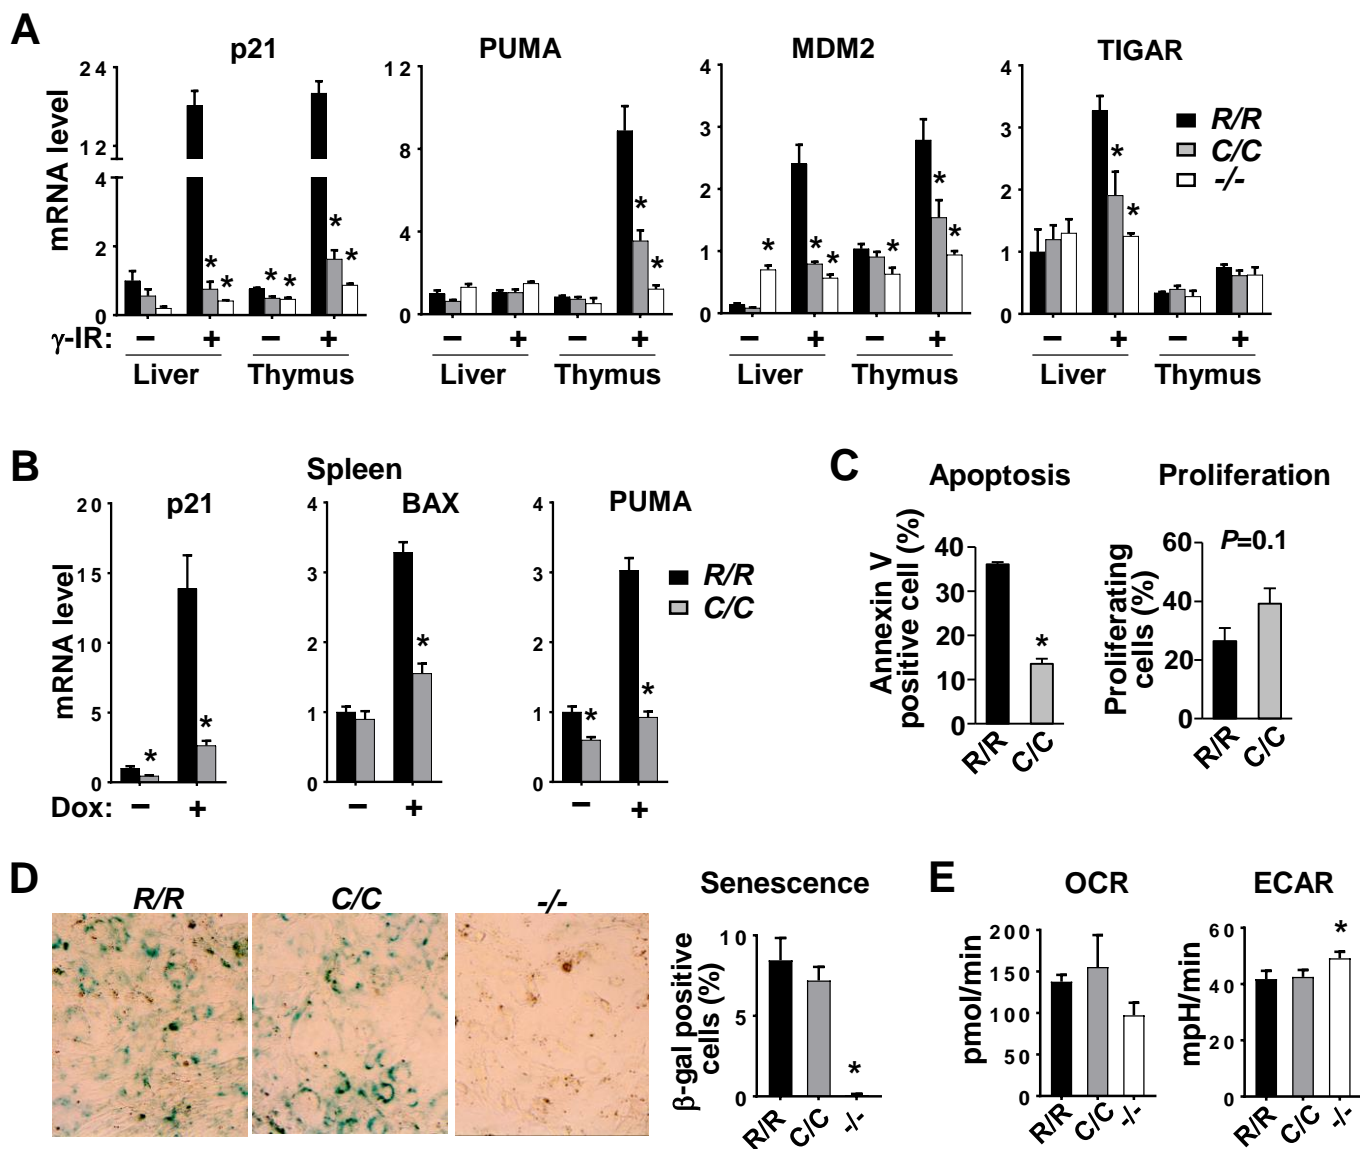

**Figure S2. p53 R178C partially retains wild-type p53 activity, Related to Figure 1.**

(A) mRNA levels of the indicated p53 target genes in  $\gamma$ -irradiated mouse tissues were quantified by RT-PCR (R/R and C/C, n = 4-5; -/-, n = 3).

(B) mRNA levels of the indicated p53 target genes in spleen of doxorubicin treated mice (n = 6).

(C) Apoptosis and proliferation of splenic T cells analyzed by flow cytometry (n = 4).

(D) Senescence in MEF cells imaged and quantified by  $\beta$ -galactosidase staining (n = 4).

(E) Oxygen consumption rate (OCR, mitochondrial respiration) and extracellular acidification rate (ECAR, glycolysis) in MEFs measured by Seahorse XF Analyzer (n = 6).

p53 R178 genotypes: wild-type (R/R); homozygous mutant (C/C); and null (-/-). Statistical difference by one-way ANOVA (A, D, E) or two-tailed unpaired *t* test (B, C) in comparison with wild-type (R/R). Values are mean  $\pm$  SEM. \**P* < 0.05

**Figure S3**

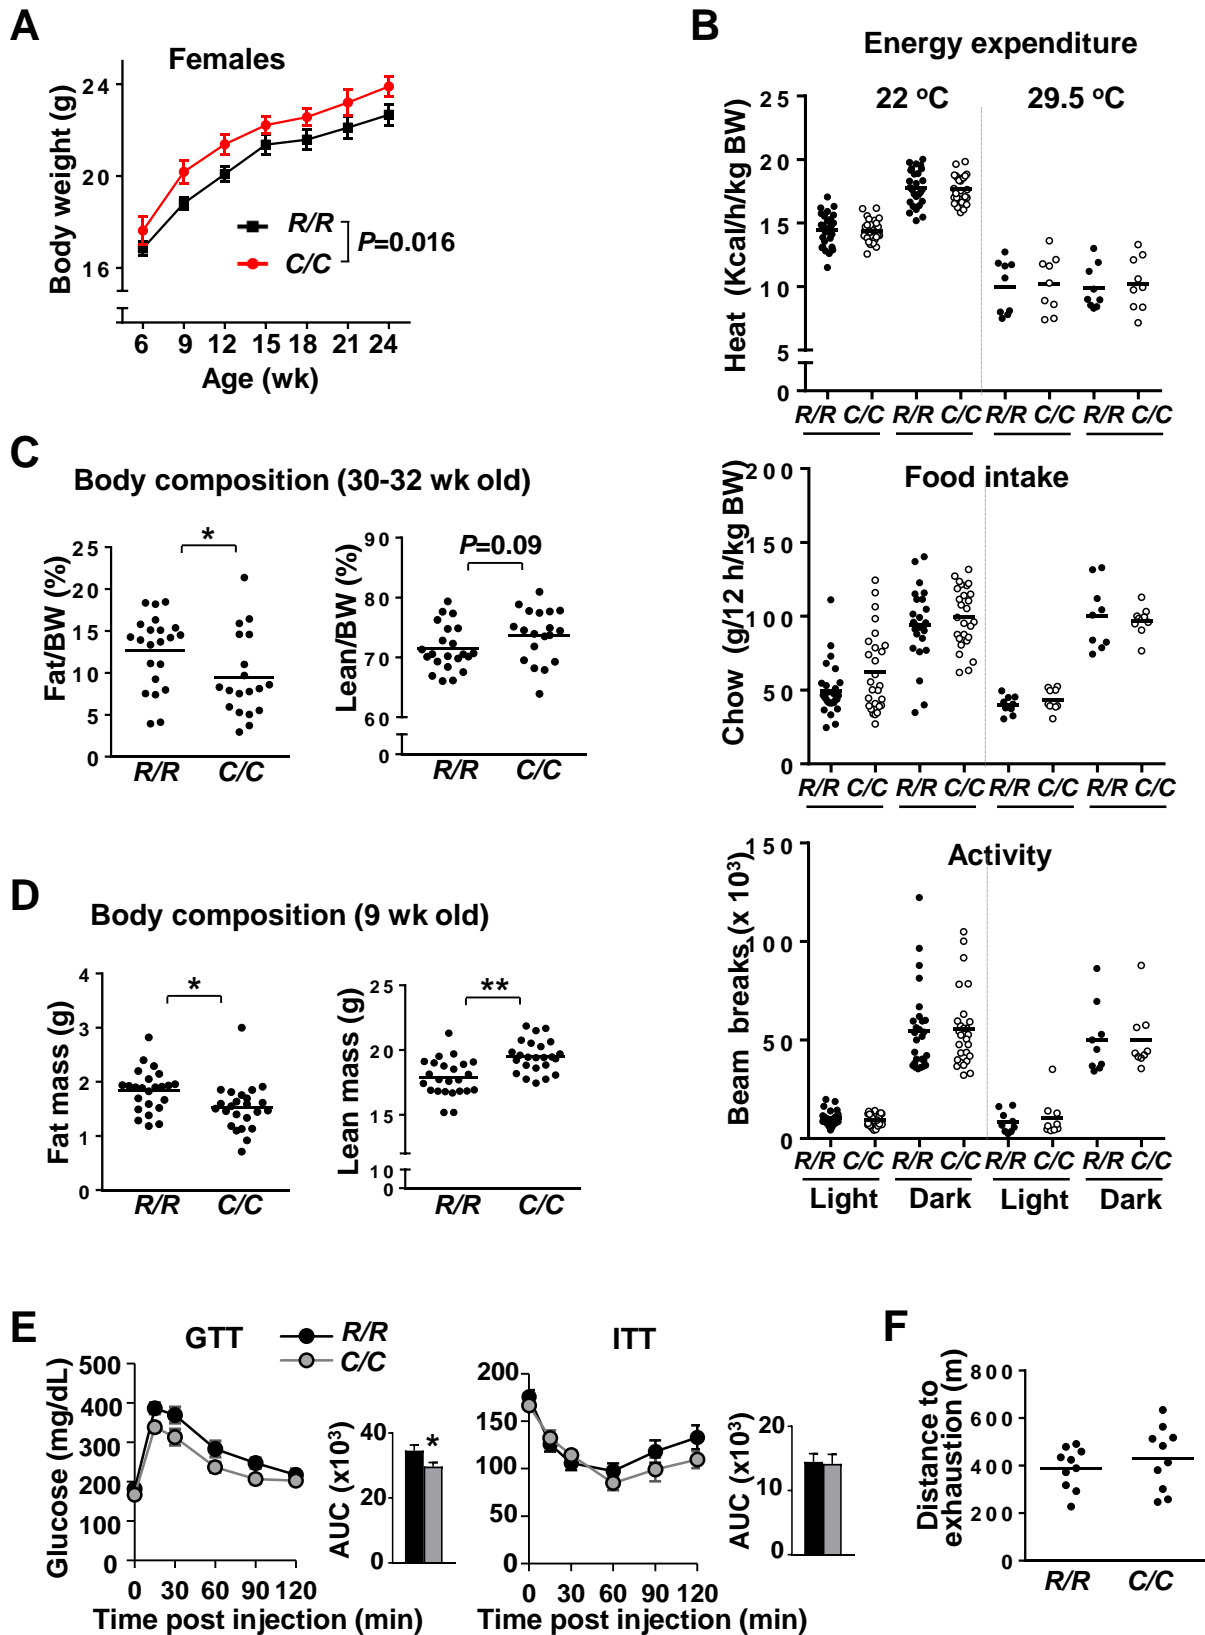

**Figure S3. Metabolic phenotype characterization, Related to Figure 1.**

(A) Body weight of female mice by age ( $n \geq 12$ ).

(B) Energy expenditure, food intake and activity of 10-13 wk old age-matched male mice with  $p53^{178C/C}$  mutant ( $C/C$ ) compared to wild-type ( $R/R$ ). The parameters were measured using the Open Circuit Calorimetry system during the indicated cycle of the day; light cycle, 6 am to 6 pm; dark cycle, 6 pm to 6 am ( $n = 27$ , for room temperature at 22 °C,  $n = 9$  for thermoneutral condition at 29.5 °C).

(C) Body composition measured by NMR expressed as percent of fat or lean of body weight (BW) in 30-32 wk old mice ( $R/R$ ,  $n = 22$ ;  $C/C$ ,  $n = 19$ ).

(D) Fat and lean mass of 9 wk old male mice ( $n = 24$ ).

(E) Glucose tolerance test (GTT) and insulin tolerance test (ITT) ( $n = 11$ ).

AUC, area under the curve.

(F) The endurance capacity measured with treadmill exercise of male mice.

$p53$  R178 genotypes: wild-type ( $R/R$ ); homozygous mutant ( $C/C$ ); and null ( $-/-$ ). Statistical difference by two-way ANOVA with repeated-measures (A) and two-tailed unpaired  $t$  test in comparison with wild-type ( $R/R$ ) (B-H). Values are mean  $\pm$  SEM. \* $P < 0.05$ , \*\* $P < 0.01$

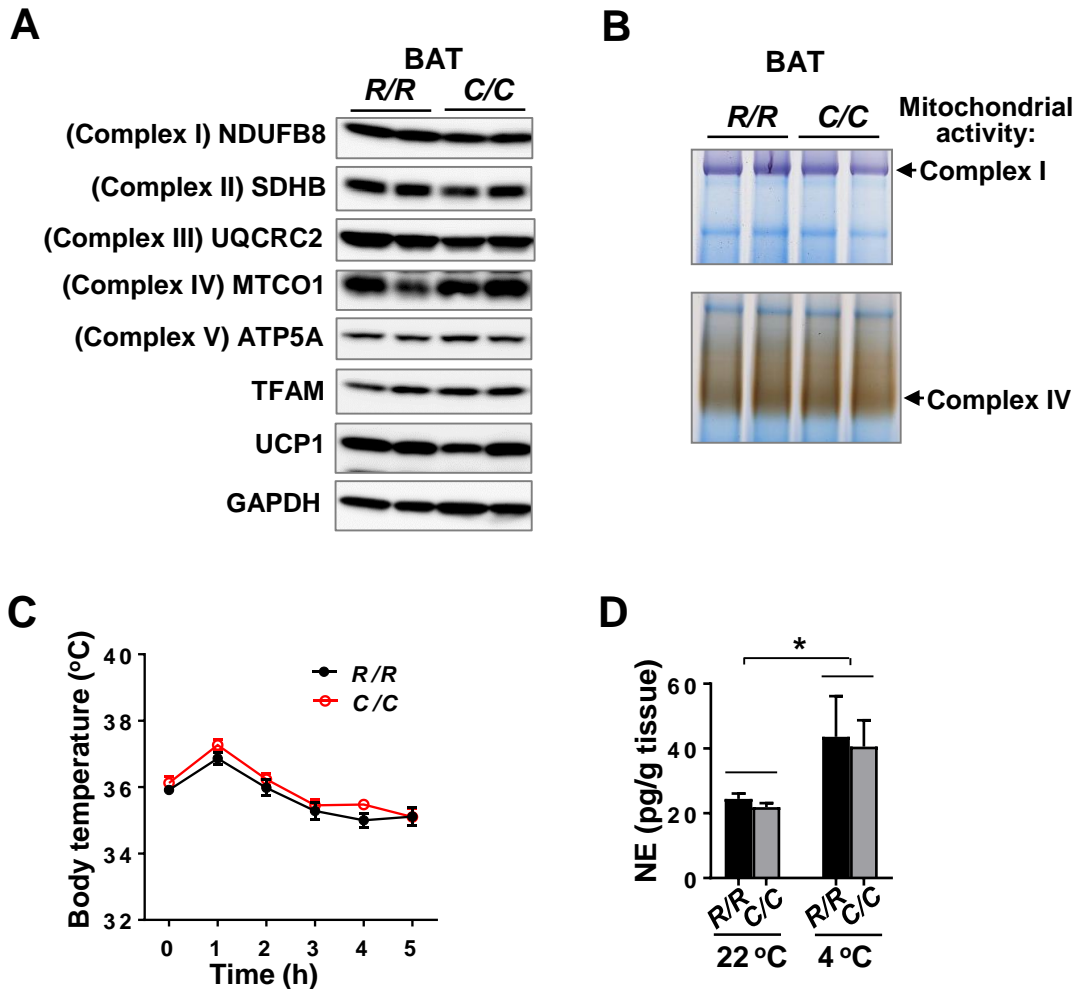

**Figure S4. Brown adipose tissue (BAT) is not significantly affected by *p53* R178C mutation, Related to Figure 2.**

(A) Western blot analysis of BAT tissue lysates.

(B) Mitochondrial activity staining. Mitochondria were purified from BAT tissues and their respiratory complex activities were visualized by blue-native in-gel staining.

(C) Time course of core body temperature measured over 5 h of cold exposure (4 °C) (*R/R*, *n* = 15; *C/C*, *n* = 13).

(D) Norepinephrine (NE) level in iWAT tissue of mice at room temperature (22 °C, *n* = 6) or after cold (4°C) exposure for 5 h (*n* = 3). The significant increase in NE level after cold exposure serves as positive control in both wild-type and mutant *p53* mice.

*p53* R178 genotypes: wild-type (*R/R*); and homozygous mutant (*C/C*). Statistical difference by two-tailed unpaired *t* test (C) or two-way ANOVA (D). Values are mean ± SEM. \**P* < 0.05

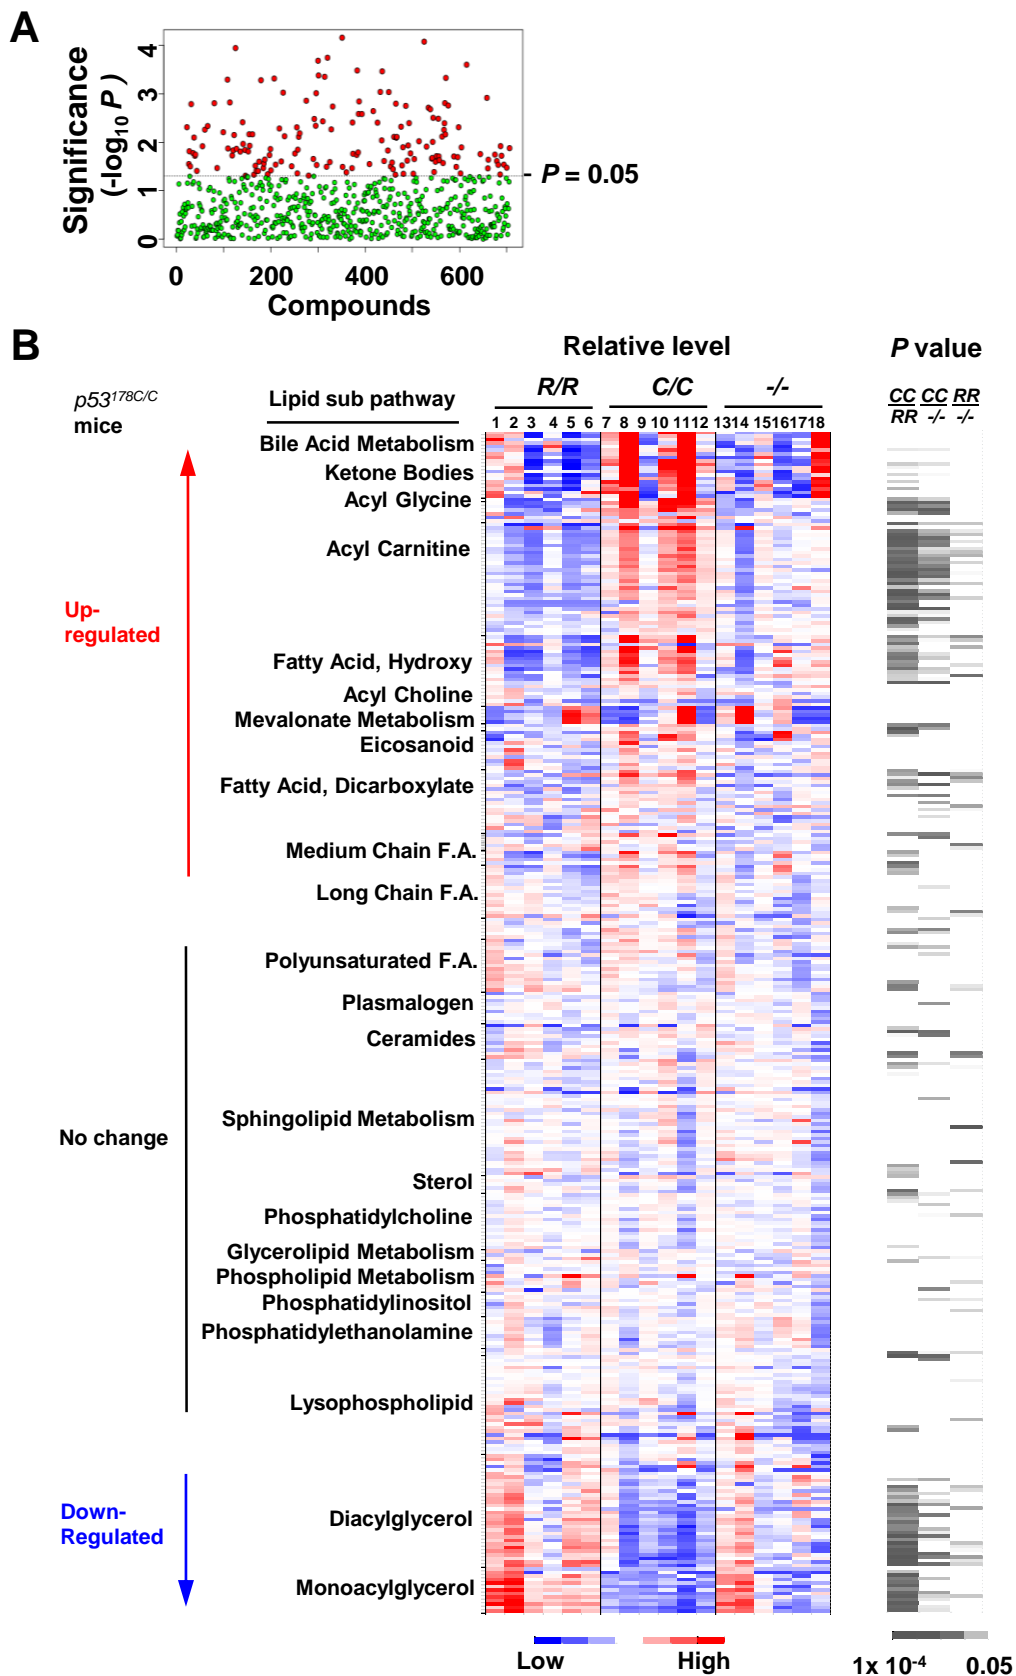

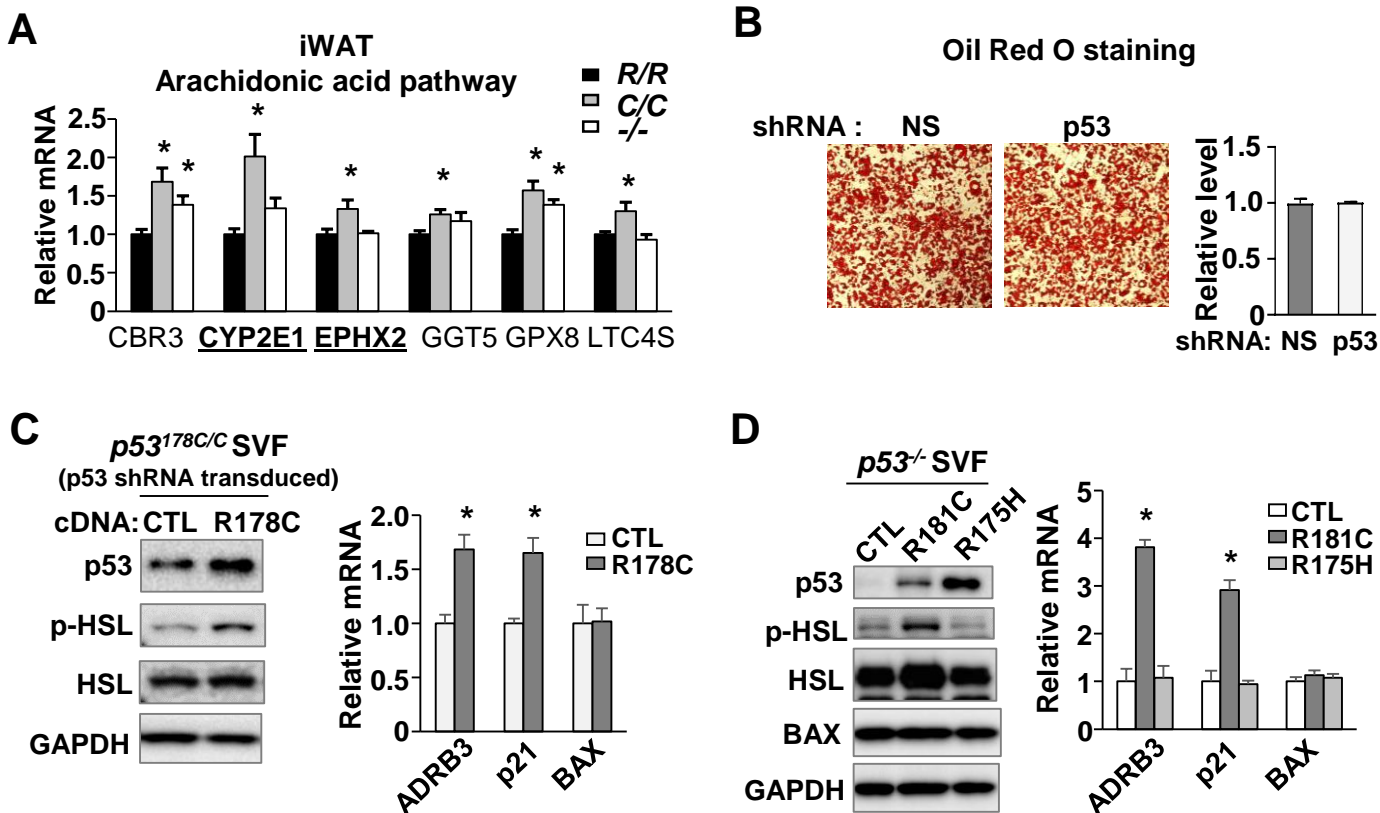

**Figure S6. p53 R178C is associated with regulation of lipid metabolism, Related to Figure 4 and 6.**

(A) Arachidonic acid pathway genes enriched in *C/C* iWAT. Genes related to 12,13-diHOME biosynthesis are shown in bold and underlined; CYP2E1 (Cytochrome P450, family 2, subfamily e, polypeptide 1) and EPHX2 (Epoxide hydrolase 2, cytoplasmic).

(B) SVF cells isolated from *C/C* iWAT were transduced with p53 or non-specific control (NS) shRNA lentivirus, differentiated into adipocytes for 6 d, and stained with Oil-Red O. The stain was eluted with 100% isopropanol and quantified by measuring A490 nm ( $n = 3$ ).

(C) Control experiment to assess for off-target effect of shRNA. Control (CTL) or p53 R178C cDNA containing lentivirus was transduced for 2 d in *p53*<sup>178C/C</sup> SVF adipocytes stably expressing p53 shRNA (described in B) to ensure that p53 R178C re-expression can rescue HSL phosphorylation and *ADRB3* mRNA levels. Representative immunoblot and mRNA levels of the respective genes are shown ( $n = 4$ ).

(D) Effect of human p53 R181C, in contrast to a loss of DNA binding mutant p53 R175H, on HSL phosphorylation and *ADRB3* expression. Control (CTL) or p53 cDNA lentivirus was transduced into *p53*<sup>-/-</sup> SVF cells and differentiated into adipocytes. Representative immunoblot and mRNA levels are shown ( $n = 3$ ). Statistical difference by one-way ANOVA or two-tailed unpaired t test in comparison with wild-type (*R/R*). Values are mean  $\pm$  SEM. \* $P < 0.05$



**A**

| Wild-type p53 |                | Mutant p53 R178C |                |
|---------------|----------------|------------------|----------------|
| Motif         | <i>P</i> value | Motif            | <i>P</i> value |
| TP53          | 9E-240         | TP53             | 2E-304         |
| PPARG::RXRA   | 2E-87          | RXRB             | 1E-107         |
| HIC1          | 3E-85          | PRDM4            | 1E-106         |
| RXRB          | 2E-74          | HIC1             | 3E-94          |
| PRDM4         | 9E-70          | E2F3             | 4E-89          |
| ZFP187        | 2E-69          | PPARG::RXRA      | 7E-83          |
| EN1           | 5E-61          | NR4A2            | 6E-75          |
| E2F1          | 1E-58          | FOXJ3            | 9E-75          |
| NFIC          | 4E-53          | GATA2            | 3E-74          |
| NFIX          | 1E-52          | LMO2             | 6E-73          |

**B****GO: Mutant p53 R178C associated genes**

| Term                                                                                  | <i>P</i> value |
|---------------------------------------------------------------------------------------|----------------|
| Positive regulation of reactive oxygen species metabolic process                      | 6E-04          |
| Intrinsic apoptotic signaling pathway in response to DNA damage by p53 class mediator | 6E-04          |
| Response to drug                                                                      | 1E-03          |
| Oxidation-reduction process                                                           | 7E-03          |
| Response to mechanical stimulus                                                       | 9E-03          |
| Negative regulation of apoptotic process                                              | 1E-02          |
| Response to endoplasmic reticulum stress                                              | 2E-02          |
| Response to glucose                                                                   | 2E-02          |
| Aging                                                                                 | 2E-02          |
| Response to toxic substance                                                           | 2E-02          |
| Apoptotic process                                                                     | 3E-02          |
| Transcription, DNA-templated                                                          | 4E-02          |

**Table S1. Motif and pathway analysis of p53 binding regions, Related to Figure 5.**

(A) Top 10 transcription factor binding motifs enriched in p53 binding regions from wild type (*R/R*) and *p53*<sup>178C/C</sup> (*C/C*) ChIP-Seq. High confidence (FDR < 1E-10) peaks were subjected to motif analyses by SeqPos motif tool in Galaxy Cistrome.

(B) Gene Ontology (GO) biological process analysis of genes proximal to mutant p53 R178C binding regions.

**Table S2. Primer sequences, Related to Star Methods.**

|                          | <b>Forward (5' → 3')</b>                                             | <b>Reverse (5' → 3')</b>                                           |
|--------------------------|----------------------------------------------------------------------|--------------------------------------------------------------------|
| <b>RT-PCR</b>            |                                                                      |                                                                    |
| <i>ADRB3</i>             | GGTAGTGGGACTCCTCGTAATG                                               | GGGTTGGTGACAGCTAGGTA                                               |
| <i>BAX</i>               | CCGGCGAATTGGAGATGAACT                                                | CCAGCCCATGATGGTTCTGAT                                              |
| <i>CDKN1A (p21)</i>      | CTGTGGGTCTCTGCCAGCTGC                                                | GAGGCCTGTCTCACCACCAAG                                              |
| <i>MDM2</i>              | GCCATTGAACCTTGTGTGATTT                                               | CATACTGGGCAGGGCTTATT                                               |
| <i>LIPE (HSL)</i>        | GTCCTCTGCTTCTCCCTCTC                                                 | CGGAGGTCTCTGAGGAACAG                                               |
| <i>BBC3 (PUMA)</i>       | AGCAGCACTTAGAGTCGCC                                                  | CCTGGGTAAGGGGAGGAG                                                 |
| <i>TIGAR</i>             | GTGGCCATCTTCCGAGAAACC                                                | GAAGCCAGCCCACCAAACCT                                               |
| <i>EIF3F (TIF)</i>       | CTGAGGATGTGCTGTCTGGGAA                                               | CCTTTGCCTCCACTTCGGTC                                               |
| <b>Genotyping</b>        |                                                                      |                                                                    |
| <i>p53</i> R178C geno    | CGAGGCCATCTCTGACTACACAG                                              | GTCCAAGCACCATTGGACGC                                               |
| <b>Southern probe</b>    |                                                                      |                                                                    |
| <i>p53</i> Exon1         | GTAGCTTCAGTTCATTGGGACC                                               | GTGTGTACAACGCGTAGCGGAG                                             |
| <b>Cloning</b>           |                                                                      |                                                                    |
| <i>p53</i> R178C         | CCCACCATGAGTGCTGCTCCGATGGTG<br>ATGGCCTGGCTC                          | GAGCCAGGCCATCACCATCGGAGCAGC<br>ACTCATGGTGGG                        |
| pLEX- <i>p53</i>         | CCGACTCTACTAGAGGATCCTGGATGA<br>CTGCCATGGAGG                          | GGCCCTCTAGACTCGAGTCAGTCTGAG<br>TCAGGCC                             |
| pGL4.10- <i>Adrb3</i> RE | CTGAGCTCGCTAGCCTCGAGACATCCC<br>CTGTGCTAAAACAG                        | AGTACCGGATTGCCAAGCTTGGAGGAA<br>GTGCGTCACTTTG                       |
| pGL4.10-p21RE            | GAGCTCGCTAGCCTCGAGTGTGTGAAT<br>GTGTGTGCATGTTTG                       | GTACCGGATTGCCAAGCTTTGTGACCTC<br>CTGTGCCTTTAC                       |
| <i>ADRB3</i> -AT(Mut1)   | GTCTGTGTTTTCCAAGAACTGAACAAGTC<br>TAGACAAGTTCAACCCTCAGAAGCTGCC<br>CTG | CAGGGCAGCTTCTGAGGGTTGAACTTG<br>TCTAGACTTGTTCAAGTCTTGGAAACAC<br>AGA |
| <i>ADRB3</i> -T(Mut2)    | CTAAGTCTGTGTTTTCCAAGAACTGGGTA<br>ATTCCAGGTAATTCCAACCCTCAGAAGC<br>TG  | CAGCTTCTGAGGGTTGGAATTACCTGGA<br>ATTACCCAGTCTTGGAAACACAGACTT<br>AG  |
| <i>p21</i> -GC(Mut1)     | CTAGCTTTCTGGCCTTCAGGGGCATGTC<br>CTGGCATGTC                           | CCTCTTCAATTCCAGGGCTGGACATGCC<br>AGGACATGCC                         |
| <i>p21</i> -T(Mut2)      | GGGACTAGCTTTCTGGCCTTCAGGAATA<br>TTTCTTGATATTTTCAGCCC                 | CCACCTCTTCAATTCCAGGGCTGAAAAT<br>ATCAAGAAATATTCCTGAA                |
| <b>Sequencing</b>        |                                                                      |                                                                    |
| <i>p53</i> cDNA          | CAGTTCATTGGGACCATCCT                                                 | CAGCAGAGACCTGACAACCTATC                                            |
| pGL4.10                  | CTAACTGGCCGGTACCTGAG                                                 | GGCTTTACCAACAGTACCGGATTG                                           |
